# Supplementary material for: Use of preclinical models for malignant pleural mesothelioma
Source: PubMed Central journal article supplement (PMC8526879; doi:10.1136/thoraxjnl-2020-216602), 2021-03-10
Supplement: thoraxjnl-2020-216602supp001.pdf [file thoraxjnl-2020-216602supp001.pdf]

Supplementary Table 1. List of human pleural mesothelioma cell lines with characterised histological and genetic background.

| Cell line  | Origin                             | Histology/Morphology              | Genetic alterations                                                                                                                                                                                                                | Ref     |
|------------|------------------------------------|-----------------------------------|------------------------------------------------------------------------------------------------------------------------------------------------------------------------------------------------------------------------------------|---------|
| MM1        | tumour tissue/<br>pleural effusion | sarcomatoid                       | loss of <i>CDKN2A</i> (7/9); <i>BAP1</i> point mutation (4/9); <i>NF2</i> loss of function (7/9); kataegis (4/9); chromoplexy (8/9)                                                                                                | [49]    |
| MM2        | tumour tissue                      | desmoplastic                      |                                                                                                                                                                                                                                    |         |
| MM3        | tumour tissue                      | epithelioid                       |                                                                                                                                                                                                                                    |         |
| MM4        | tumour tissue                      | biphasic                          |                                                                                                                                                                                                                                    |         |
| MM5        | tumour tissue                      | biphasic                          |                                                                                                                                                                                                                                    |         |
| MM7        | tumour tissue                      | epithelioid                       |                                                                                                                                                                                                                                    |         |
| MM8        | tumour tissue                      | epithelioid                       |                                                                                                                                                                                                                                    |         |
| MM9        | tumour tissue                      | sarcomatoid                       |                                                                                                                                                                                                                                    |         |
| MM10       | tumour tissue                      | epithelioid                       |                                                                                                                                                                                                                                    |         |
| MPM 1      | tumour tissue                      | epithelioid                       |                                                                                                                                                                                                                                    |         |
| MPM 2      | tumour tissue                      | epithelioid                       |                                                                                                                                                                                                                                    |         |
| MPM 3      | tumour tissue                      | epithelioid                       |                                                                                                                                                                                                                                    |         |
| MPM 4      | tumour tissue                      | biphasic                          |                                                                                                                                                                                                                                    |         |
| MPM 5      | tumour tissue                      | biphasic                          |                                                                                                                                                                                                                                    |         |
| MPM 6      | tumour tissue                      | biphasic                          |                                                                                                                                                                                                                                    |         |
| MPM 7      | tumour tissue                      | sarcomatoid                       |                                                                                                                                                                                                                                    |         |
| MPM 8      | tumour tissue                      | sarcomatoid                       |                                                                                                                                                                                                                                    |         |
| MPM 9      | tumour tissue                      | sarcomatoid                       |                                                                                                                                                                                                                                    |         |
| MESO-3T    | tumour tissue                      | epithelioid                       | heterozygous loss of <i>NF2</i> (5/8), loss of p16 <sup>INK4a</sup> and p14 <sup>ARF</sup> (7/8), structural abnormalities in chr1, 2, 3, 6, 7 and 9                                                                               | [48]    |
| MESO-7T    | tumour tissue                      | biphasic                          |                                                                                                                                                                                                                                    |         |
| MESO-8T    | tumour tissue                      | epithelioid with sarcomatoid loci |                                                                                                                                                                                                                                    |         |
| MESO-9T    | tumour tissue                      | epithelioid                       |                                                                                                                                                                                                                                    |         |
| MESO-12T   | tumour tissue                      | epithelioid                       |                                                                                                                                                                                                                                    |         |
| MESO-14T   | tumour tissue                      | epithelioid                       |                                                                                                                                                                                                                                    |         |
| MESO-17T   | tumour tissue                      | epithelioid                       |                                                                                                                                                                                                                                    |         |
| MESO-27T   | tumour tissue                      | epithelioid                       |                                                                                                                                                                                                                                    |         |
| MM04       | pleural biopsy                     | desmoplastic                      | chromosomal abnormalities ranging from 41 to 113; monosomy of chr8, 14, 22 (2/5) and 17 (3/5); deletion/translocation in chr1, 5, 6 (epithelioid type) and chr1, 9, 19 (biphasic type); rearrangement of chr1 (5/5) and chr6 (1/5) | [64]    |
| MM05       | pleural biopsy                     | biphasic                          |                                                                                                                                                                                                                                    |         |
| MM12       | pleural biopsy                     | biphasic                          |                                                                                                                                                                                                                                    |         |
| MM13       | pleural biopsy                     | biphasic                          |                                                                                                                                                                                                                                    |         |
| MM1081     | pleural biopsy                     | epithelioid                       |                                                                                                                                                                                                                                    |         |
| PF1038     | pleural effusion                   | unclassified                      |                                                                                                                                                                                                                                    |         |
| HMM-1      | pleural effusion                   | NA                                | NA                                                                                                                                                                                                                                 | [57]    |
| HMM-3      | pleural effusion                   | NA                                | NA                                                                                                                                                                                                                                 |         |
| MPM1       | pleural effusion                   | sarcomatoid                       | hypotetraploid with a modal chr 79                                                                                                                                                                                                 | [55]    |
| MPM2       | pleural effusion                   | epithelioid                       | hypodiploid with a modal chr 40                                                                                                                                                                                                    |         |
| MPM3       | pleural effusion                   | biphasic                          | hyperdiploid with a modal chr 44                                                                                                                                                                                                   |         |
| ACC-MESO-1 | tumour tissue                      | epithelioid                       | <i>NF2</i> mutation (1/4); p16 <sup>INK4a</sup> and p14 <sup>ARF</sup> homologous deletion (4/4)                                                                                                                                   | [65,66] |
| ACC-MESO-4 | tumour tissue                      | epithelioid                       |                                                                                                                                                                                                                                    |         |

|            |                  |                                    |                                                                                                                                                                                                                                                                 |      |
|------------|------------------|------------------------------------|-----------------------------------------------------------------------------------------------------------------------------------------------------------------------------------------------------------------------------------------------------------------|------|
| Y-MESO-8   | pleural effusion | biphasic                           |                                                                                                                                                                                                                                                                 |      |
| Y-MESO-9   | pleural effusion | NA                                 |                                                                                                                                                                                                                                                                 |      |
| Y-MESO-12  | pleural effusion | NA                                 |                                                                                                                                                                                                                                                                 |      |
| Y-MESO-14  | pleural effusion | NA                                 |                                                                                                                                                                                                                                                                 |      |
| Y-MESO-21  | pleural effusion | NA                                 |                                                                                                                                                                                                                                                                 |      |
| Y-MESO-22  | pleural effusion | NA                                 |                                                                                                                                                                                                                                                                 |      |
| Y-MESO-25  | pleural effusion | NA                                 |                                                                                                                                                                                                                                                                 |      |
| Y-MESO-26B | pleural effusion | NA                                 |                                                                                                                                                                                                                                                                 |      |
| Y-MESO-27  | pleural effusion | NA                                 |                                                                                                                                                                                                                                                                 |      |
| Y-MESO-28  | pleural effusion | NA                                 |                                                                                                                                                                                                                                                                 |      |
| Y-MESO-29  | pleural effusion | NA                                 |                                                                                                                                                                                                                                                                 |      |
| Y-MESO-30  | pleural effusion | NA                                 |                                                                                                                                                                                                                                                                 |      |
| MM-Z03S    | pleural effusion | sarcomatoid                        | both cell lines included chromosomal losses of 1q34~qter, 4, 9p, 10p, 13, 14, 16q, 18, and 22, as well as a complex structural aberration involving chr17. MMZ03E had gains of 3q11q27 and 5p, while MM-Z03S had gain of 9q and losses of 3q27qter, 11q, and 18 | [56] |
| MM-Z03E    |                  | epithelioid                        |                                                                                                                                                                                                                                                                 |      |
| MES-BR 95  | pleural effusion | biphasic                           | NA                                                                                                                                                                                                                                                              | [67] |
| MES-CM 98  | pleural effusion | epithelioid                        |                                                                                                                                                                                                                                                                 |      |
| MES-CG 98  | pleural effusion | biphasic                           |                                                                                                                                                                                                                                                                 |      |
| MES-CE 96  | pleural effusion | biphasic                           |                                                                                                                                                                                                                                                                 |      |
| MES-GF 99  | pleural effusion | biphasic                           |                                                                                                                                                                                                                                                                 |      |
| MES-MM 98  | pleural effusion | sarcomatoid                        |                                                                                                                                                                                                                                                                 |      |
| MES-OC 99  | pleural effusion | sarcomatoid                        |                                                                                                                                                                                                                                                                 |      |
| MES-PP 89  | pleural effusion | sarcomatoid                        |                                                                                                                                                                                                                                                                 |      |
| JL1        | tumour biopsy    | epithelioid                        | chromosomal deletions and translocations; chromosomal trisomies and monosomies                                                                                                                                                                                  | [68] |
| DM3        | tumour biopsy    | sarcomatoid                        |                                                                                                                                                                                                                                                                 |      |
| PJ3        | pleural effusion | biphasic                           |                                                                                                                                                                                                                                                                 |      |
| HMMME      | pleural effusion | spindle, round and polygonal shape | aneuploidy                                                                                                                                                                                                                                                      | [69] |
| IST-Mes1   | pleural effusion | epithelioid-like                   | monosomy of chr17 (4/4), chr13 (3/4), chr22 (2/4); deletion/translocation of chr6 (4/4), chr1 (3/4), chr1 (3/4)                                                                                                                                                 | [70] |
| IST-Mes2   | pleural effusion | epithelioid-like                   |                                                                                                                                                                                                                                                                 |      |
| IST-Mes3   | pleural effusion | spindle-shaped                     |                                                                                                                                                                                                                                                                 |      |
| MPP89      | pleural effusion | epithelioid-like                   |                                                                                                                                                                                                                                                                 |      |
| H2596      | tumour tissue    | sarcomatoid                        | deletion, inversion and translocation affecting chr1, 3, 6, 9; chromosome numbers ranging from 34 to 90; abnormalities in number of chr3, 4, 5, 9, 11, 14, 15, 22                                                                                               | [50] |
| H2591      | tumour tissue    | epithelioid                        |                                                                                                                                                                                                                                                                 |      |
| H2461      | tumour tissue    | epithelioid                        |                                                                                                                                                                                                                                                                 |      |
| HP-1       | pleural effusion | biphasic                           |                                                                                                                                                                                                                                                                 |      |
| HP-2       | pleural effusion | epithelioid                        |                                                                                                                                                                                                                                                                 |      |
| H2373      | tumour tissue    | sarcomatoid                        |                                                                                                                                                                                                                                                                 |      |
| H2452      | tumour tissue    | biphasic                           |                                                                                                                                                                                                                                                                 |      |
| HP-3       | pleural effusion | epithelioid                        |                                                                                                                                                                                                                                                                 |      |
| H2595      | tumour tissue    | epithelioid                        |                                                                                                                                                                                                                                                                 |      |
| ZL5        | pleural effusion | biphasic                           |                                                                                                                                                                                                                                                                 |      |
| ZL34       | tumour tissue    | sarcomatoid                        |                                                                                                                                                                                                                                                                 |      |

|          |                  |                 |                                                                                                                               |          |      |
|----------|------------------|-----------------|-------------------------------------------------------------------------------------------------------------------------------|----------|------|
| ZL55     | tumour tissue    | epithelioid     |                                                                                                                               |          |      |
| ZL92     | pleural effusion | not determined  |                                                                                                                               |          |      |
| SPC78    | tumour tissue    | sarcomatoid     |                                                                                                                               |          |      |
| SPC111   | pleural effusion | biphasic        |                                                                                                                               |          |      |
| SPC212   | tumour tissue    | biphasic        |                                                                                                                               |          |      |
| JU77     | pleural effusion | spindle-shaped  | deletion of long arm of chr6 (4/5);<br>chromosome 1 rearrangements                                                            | [52]     |      |
| LO68     | pleural effusion | spindle-shaped  |                                                                                                                               |          |      |
| ONE58    | pleural effusion | spindle-shaped  |                                                                                                                               |          |      |
| NO36     | pleural effusion | stellate-shaped |                                                                                                                               |          |      |
| DeH136   | pleural effusion | pleomorphic     |                                                                                                                               |          |      |
| 1/M9K    | metastasis       | biphasic        | deletion of long arm of chr5 (5/6);<br>monosomy of chr9 (4/6), chr13<br>(3/6) and chr22 (2/6);<br>rearrangement of chr1 (3/6) | [53]     |      |
| 2/M10K   | metastasis       | biphasic        |                                                                                                                               |          |      |
| 3/M14K   | tumour tissue    | epithelioid     |                                                                                                                               |          |      |
| 3/M20    | pleural effusion | epithelioid     |                                                                                                                               |          |      |
| 3/M19    | pleural effusion | epithelioid     |                                                                                                                               |          |      |
| 4/M33K   | tumour tissue    | biphasic        |                                                                                                                               |          |      |
| 5/M38K   | tumour tissue    | biphasic        |                                                                                                                               |          |      |
| 6/M22K   | tumour tissue    | biphasic        |                                                                                                                               |          |      |
| 6/M19    | pleural effusion | biphasic        |                                                                                                                               |          |      |
| Mero-25  | pleura autopsy   | biphasic        | abnormalities in number of ch1, 3,<br>6, 9, 12 and 22; loss of chr4                                                           | [54]     |      |
| Mero-48a | pleura autopsy   | biphasic        |                                                                                                                               |          |      |
| Mero-72  | pleura biopsy    | biphasic        |                                                                                                                               |          |      |
| Mero-96  | pleura biopsy    | sarcomatoid     |                                                                                                                               |          |      |
| Mero-14  | pleural effusion | NA              |                                                                                                                               |          |      |
| Mero-41  | pleural effusion | NA              |                                                                                                                               |          |      |
| Mero-64  | pleural effusion | NA              |                                                                                                                               |          |      |
| Mero-82  | pleural effusion | NA              |                                                                                                                               |          |      |
| Mero-83  | pleural effusion | NA              |                                                                                                                               |          |      |
| Mero-84  | pleural effusion | NA              |                                                                                                                               |          |      |
| Mero-95  | pleural effusion | NA              |                                                                                                                               |          |      |
| P31      | NA               | Epithelioid     | NA                                                                                                                            |          |      |
| VMC6     | NA               | Epithelioid     | NA                                                                                                                            | [59][61] |      |
| VMC11    | NA               | Biphasic        | NA                                                                                                                            |          |      |
| VMC12    | NA               | Epithelioid     | NA                                                                                                                            |          |      |
| VMC14    | NA               | Epithelioid     | NA                                                                                                                            |          |      |
| VMC20    | NA               | Epithelioid     | NA                                                                                                                            |          |      |
| VMC23    | NA               | Epithelioid     | NA                                                                                                                            |          |      |
| VMC28    | NA               | Epithelioid     | NA                                                                                                                            |          |      |
| VMC31    | NA               | Epithelioid     | NA                                                                                                                            |          |      |
| VMC33    | NA               | Epithelioid     | NA                                                                                                                            |          |      |
| VMC40    | NA               | Biphasic        | NA                                                                                                                            |          |      |
| Meso49   | NA               | Epithelioid     | NA                                                                                                                            |          |      |
| Meso53   | NA               | Biphasic        | NA                                                                                                                            |          |      |
| Meso62   | NA               | Sarcomatoid     | NA                                                                                                                            |          |      |
| SPC111   | NA               | Biphasic        | NA                                                                                                                            |          |      |
| SPC212   | NA               | Biphasic        | NA                                                                                                                            |          |      |
| M38K     | NA               | Biphasic        | NA                                                                                                                            |          |      |
| MM288    | NA               | Epithelioid     | NA                                                                                                                            |          | [62] |

|          |        |             |                                                                                                                                  |      |
|----------|--------|-------------|----------------------------------------------------------------------------------------------------------------------------------|------|
| MM317    | NA     | Epithelioid | NA                                                                                                                               |      |
| MM404    | NA     | Epithelioid | NA                                                                                                                               |      |
| MM473    | NA     | Epithelioid | NA                                                                                                                               |      |
| MM487    | NA     | Biphasic    | NA                                                                                                                               |      |
| MM491    | NA     | Biphasic    | NA                                                                                                                               |      |
| MM432    | NA     | Sarcomatoid | NA                                                                                                                               |      |
| MM472    | NA     | Sarcomatoid | NA                                                                                                                               |      |
| H-MESO-1 | Tumour | Epithelioid | Pseudotriploid with 68 chromosomes including multiple abnormalities (monosomy, translocations, deletion, trisomy, and tetrasomy) | [63] |
